# Supplementary material for: A Systems Biology-Based Investigation into the Pharmacological Mechanisms of Wu Tou Tang Acting on Rheumatoid Arthritis by Integrating Network Analysis
Source: Evid Based Complement Alternat Med. 2013 Mar 28;2013:548498. doi: 10.1155/2013/548498 (PMC3625555; doi:10.1155/2013/548498)
Supplement: Supplementary file 1 — Table S1: describes the detailed information on known drugs and therapeutic targets for the treatment of rheumatoid arthritis. It includes drug name, drug accession number, drug group, target name, target UniprotID and target gene symbol. Table S2: describes the detailed information on eight existing protein-protein interaction databases including source name, website and release number/last updated date. Table S3: describes the detailed information on the similar drugs of compositive compounds of each ingredient in Wu Tou Tang and the predicted effector molecules of Wu Tou Tang. Table S4: describes the detailed information on the FDA-approved drugs for the treatment of rheumatoid arthritis and their known targets. Table S5: describes the detailed information on the major candidate effector molecules and their corresponding compounds in Wu Tou Tang including drug compounds, drug target UniprotID, drug target UniprotACC and drug target gene symbol. Table S6: describes the detailed information on the positive docking results for compound-potential target interactions including drug compound, drug target UniprotID, drug target UniprotACC, drug target gene symbol, drug target PDB ID and Ehits score. [file 548498.f1.xlsx]

## Sheet: Sheet1
Table S1 Detailed information on known drugs and therapeutic targets for the treatment of rheumatoid arthritis
Drug_name	Drug_Accession_Number	Drug_group	Target_name	Target_UniprotID	Target_genesymbol
Abatacept	DB01281	approved	T-lymphocyte activation antigen CD80	P33681	CD80
			T-lymphocyte activation antigen CD86	P42081	CD86
Sulfasalazine	DB00795 (APRD00152, DB08518)	approved	Arachidonate 5-lipoxygenase	P09917	ALOX5
			Prostaglandin G/H synthase 2	P35354	PTGS2
			Prostaglandin G/H synthase 1	P23219	PTGS1
			Peroxisome proliferator-activated receptor gamma	P37231	PPARG
			Inhibitor of nuclear factor kappa-B kinase subunit alpha	O15111	CHUK
			Inhibitor of nuclear factor kappa-B kinase subunit beta	O14920	IKBKB
			Cystine/glutamate transporter	Q9UPY5	SLC7A11
			Acetyl-CoA acetyltransferase, mitochondrial	P24752	ACAT1
Oxaprozin	DB00991	approved	Prostaglandin G/H synthase 1	P23219	PTGS1
			Prostaglandin G/H synthase 2	P35354	PTGS2
L-Histidine	DB00117	approved	Histidine decarboxylase	P19113	HDC
			Histidyl-tRNA synthetase, cytoplasmic	P12081	HARS
			System N amino acid transporter 1	Q99624	SLC38A3
			Histidine ammonia-lyase	P42357	HAL
Piroxicam	DB00554	approved	Prostaglandin G/H synthase 2	P35354	PTGS2
			Prostaglandin G/H synthase 1	P23219	PTGS1
Methotrexate	DB00563	approved	Dihydrofolate reductase	P00374	DHFR
Etodolac	DB00749	approved	Prostaglandin G/H synthase 2	P35354	PTGS2
			Prostaglandin G/H synthase 1	P23219	PTGS1
			Retinoic acid receptor RXR-alpha	P19793	RXRA
Auranofin	DB00995	approved	Peroxiredoxin-5, mitochondrial	P30044	PRDX5
			Inhibitor of nuclear factor kappa-B kinase subunit beta	O14920	IKBKB
Flurbiprofen	DB00712	approved	Peroxiredoxin-5, mitochondrial	P30044	PRDX5
			Inhibitor of nuclear factor kappa-B kinase subunit beta	O14920	IKBKB
Celecoxib	DB00482	approved	Prostaglandin G/H synthase 2	P35354	PTGS2
			3-phosphoinositide-dependent protein kinase 1	O15530	PDPK1
Niflumic Acid	DB04552	approved	Phospholipase A2	P04054	PLA2G1B
			Prostaglandin G/H synthase 2	P35354	PTGS2
			Chloride channel protein ClC-Ka	P51800	CLCNKA
			Prostaglandin G/H synthase 1	P23219	PTGS1
			Cytosolic phospholipase A2	P47712	PLA2G4A
			UDP-glucuronosyltransferase 1-9	O60656	UGT1A9
HydroxychloroquineDB01611	DB01611	approved	Toll-like receptor 7	Q9NYK1	TLR7
			Toll-like receptor 9	Q9NR96	TLR9
Chloroquine	DB00608	approved	Glutathione S-transferase A2	P09210	GSTA2
			Tumor necrosis factor	P01375	TNF
			Toll-like receptor 9	Q9NR96	TLR9
Naproxen	DB00788	approved	Prostaglandin G/H synthase 2	P35354	PTGS2
			Prostaglandin G/H synthase 1	P23219	PTGS1
Phenylbutazone	DB00812	approved	Prostaglandin G/H synthase 2	P35354	PTGS2
			Prostacyclin synthase	Q16647	PTGIS
			Prostaglandin G/H synthase 1	P23219	PTGS1
Anakinra	DB00026	approved	Interleukin-1 receptor type I	P14778	IL1R1
Etanercept	DB00005	approved	Tumor necrosis factor	P01375	TNF
			Tumor necrosis factor receptor superfamily member 1B	P20333	TNFRSF1B
			High affinity immunoglobulin gamma Fc receptor I	P12314	FCGR1A
			Low affinity immunoglobulin gamma Fc region receptor III-A	P08637	FCGR3A
			Low affinity immunoglobulin gamma Fc region receptor II-a	P12318	FCGR2A
			Low affinity immunoglobulin gamma Fc region receptor II-b	P31994	FCGR2B
			Low affinity immunoglobulin gamma Fc region receptor II-c	P31995	FCGR2C
			Lymphotoxin-alpha	P01374	LTA
			Low affinity immunoglobulin gamma Fc region receptor III-B	O75015	FCGR3B
			Complement C1s subcomponent	P09871	C1S
			Complement C1r subcomponent	P00736	C1R
			Complement C1q subcomponent subunit A	P02745	C1QA
			Complement C1q subcomponent subunit B	P02746	C1QB
			Complement C1q subcomponent subunit C	P02747	C1QC
Diclofenac	DB00586	approved	Prostaglandin G/H synthase 2	P35354	PTGS2
			Prostaglandin G/H synthase 1	P23219	PTGS1
			Arachidonate 5-lipoxygenase	P09917	ALOX5
			Sodium channel protein type 4 subunit alpha	P35499	SCN4A
			Amiloride-sensitive cation channel 2, neuronal	P78348	ACCN2
			Potassium voltage-gated channel subfamily KQT member 2	O43526	KCNQ2
			Potassium voltage-gated channel subfamily KQT member 3	O43525	KCNQ3
			Phospholipase A2, membrane associated	P14555	PLA2G2A
Levamisole	DB00848	approved	Neuronal acetylcholine receptor subunit alpha-3	P32297	CHRNA3
			Alkaline phosphatase, placental-like	P10696	ALPPL2
Ketoprofen	DB01009	approved	Prostaglandin G/H synthase 1	P23219	PTGS1
			Prostaglandin G/H synthase 2	P35354	PTGS2
			High affinity interleukin-8 receptor A	P25024	IL8RA
Diflunisal	DB00861	approved	Prostaglandin G/H synthase 2	P35354	PTGS2
			Prostaglandin G/H synthase 1	P23219	PTGS1
Etoricoxib	DB01628	approved	Prostaglandin G/H synthase 2	P35354	PTGS2
Tolmetin	DB00500	approved	Prostaglandin G/H synthase 2	P35354	PTGS2
			Prostaglandin G/H synthase 1	P23219	PTGS1
Canakinumab	DB06168	approved	Interleukin-1 beta	P01584	IL1B
Phenacetin	DB03783	approved	Prostaglandin G/H synthase 1	P23219	PTGS1
Glucosamine	DB01296	approved	Matrix metalloproteinase-9	P14780
			Nuclear factor NF-kappa-B p100 subunit	Q00653	NFKB2
			Tumor necrosis factor	P01375	TNF
			Interferon gamma	P01579	IFNG
			Chitosanase	P33673	csn
Fenoprofen	DB00573	approved	Prostaglandin G/H synthase 2	P35354	PTGS2
			Prostaglandin G/H synthase 1	P23219	PTGS1
Azathioprine	DB00993	approved	Hypoxanthine-guanine phosphoribosyltransferase	P00492	HPRT1
Leflunomide	DB01097	approved	Dihydroorotate dehydrogenase, mitochondrial	Q02127	DHODH
			Arachidonate 5-lipoxygenase	P09917	ALOX5
			Aryl hydrocarbon receptor	P35869	AHR
			Protein tyrosine kinase 2 beta	Q14289	PTK2B
Calcitriol	DB00136	approved, nutraceutical	Vitamin D3 receptor	P11473	VDR
