# Supplementary material for: A Systems Biology-Based Investigation into the Pharmacological Mechanisms of Wu Tou Tang Acting on Rheumatoid Arthritis by Integrating Network Analysis
Source: Evid Based Complement Alternat Med. 2013 Mar 28;2013:548498. doi: 10.1155/2013/548498 (PMC3625555; doi:10.1155/2013/548498)
Supplement: Supplementary file 2 [file 548498.f2.xlsx]

## Sheet: Sheet1
Table S2 Detailed information on eight existing protein-protein interaction databases
Source_name	Website	Release number/ Last updated
Human Annotated and Predicted Protein Interaction Database (HAPPI)	http://bio.informatics.iupui.edu/HAPPI/	Version 31.2
Reactome	http://www.reactome.org/	Version 37
Online Predicted Human Interaction Database (OPHID)	http://ophid.utoronto.ca	Version 1.71
InAct	www.ebi.ac.uk/intact/	Version 2.0
Human Protein Reference Database (HPRD)	http://www.hprd.org/	Release 8
Molecular INTeraction Database (MINT)	http://mint.bio.uniroma2.it/mint/download.do	Aug-2011
Database of Interacting Proteins (DIP)	http://dip.doe-mbi.ucla.edu/dip/	Jan-2010
PDZBase	http://icb.med.cornell.edu/services/pdz/start	2004
