# Supplementary material for: A Systems Biology-Based Investigation into the Pharmacological Mechanisms of Wu Tou Tang Acting on Rheumatoid Arthritis by Integrating Network Analysis
Source: Evid Based Complement Alternat Med. 2013 Mar 28;2013:548498. doi: 10.1155/2013/548498 (PMC3625555; doi:10.1155/2013/548498)
Supplement: Supplementary file 3 [file 548498.f3.xlsx]

## Sheet: Radix Aconiti
ID	Drug ID	Drug Name	Tanimoto Coefficient	Similarity Level	Indication	Therapeutic Class	Target	Target-BioChemical Class
1	DAP000114	Vincristine	0.850766	Similar	Acute lymphoblastic leukemia and nephroblastoma	Antineoplastic Agents	Tubulin	NULL
2	DAP000120	Digitoxin	0.852724	Similar	Congestive cardiac insufficiency, arrhythmias and heart failure	Anti-Arrhythmia Agents	Sodium/potassium-transporting ATPase	Hydrolases acting on acid anhydrides
3	DAP000162	Tacrolimus	0.861878	Similar	Ocular allergy/Organ Transplant	Immunosuppressive Agents	Calcineurin	NULL
4	DAP000367	Palonosetron	0.926454	Very Similar	Nausea and vomiting	Antiemetics	5-hydroxytryptamine receptor 3A	Ion transport
5	DAP000401	Oxytetracycline	0.858011	Similar	Bacterial infections	Antibacterial Agents	30S ribosomal subunit	NULL
6	DAP000410	Clarithromycin	0.867546	Similar	Bacterial infections	Antibacterial Agents	50S ribosomal subunit	NULL
7	DAP000415	Alclometasone	0.852319	Similar	Inflammatory diseases	Anti-inflammatory Agents	Corticosteroid-binding globulin	NULL
8	DAP000421	Fluocinonide	0.873497	Similar	Inflammatory diseases	Anti-inflammatory Agents	Corticosteroid-binding globulin	NULL
9	DAP000465	Ouabain	0.888013	Similar	Atrial fibrillation and heart failure	Cardiotonic Agents	Sodium/potassium-transporting ATPase alpha-1 chain	Hydrolases acting on acid anhydrides
10	DAP000505	Mexiletine	0.90321	Very Similar	Ventricular arrhythmias	Anti-Arrhythmia Agents	Sodium channel protein type 5 subunit alpha	Voltage-gated channel
11	DAP000594	Pimecrolimus	0.885557	Similar	Atopic dermatitis (eczema)	Dermatologic Agents	Calcineurin	NULL
12	DAP000744	Digoxin	0.906948	Very Similar	Congestive cardiac insufficiency, arrhythmias and heart failure	Anti-Arrhythmia Agents	Sodium/potassium-transporting ATPase	Hydrolases acting on acid anhydrides
13	DAP000765	Vinorelbine	0.858164	Similar	Cancers	Antineoplastic Agents	Tubulin	NULL
14	DAP000796	Methoxamine	0.88702	Similar	Hypertension	Antihypertensive Agents	Alpha-1B adrenergic receptor	G-protein coupled receptor (rhodopsin family)
15	DAP000874	Mannitol	0.945584	Very Similar	Renal failure	Sweetening Agents	Mannitol 2-dehydrogenase	Oxidoreductases acting on the CH-OH group of donors
16	DAP000888	Dirithromycin	0.914887	Very Similar	Bacterial infections	Antibacterial Agents	50S ribosomal subunit	NULL
17	DAP001008	Fusidic Acid	0.853425	Similar	Bacterial infections	Antibacterial Agents	Elongation factor G	NULL
18	DAP001044	Amcinonide	0.857516	Similar	Inflammatory diseases	Antiinflammatory Agents	Glucocorticoid receptor	Zinc-finger
19	DAP001104	Voglibose	0.850125	Similar	Diabetes mellitus	Hypoglycemic Agents	Maltase-glucoamylase, intestinal (Alpha-glucosidase)	Transmembrane protein
20	DAP001183	Clobetasol	0.862841	Similar	Inflammation and itching	Antiinflammatory Agents	Phospholipase A2	Hydrolases acting on ester bonds
21	DAP001184	Diflorasone	0.93141	Very Similar	Skin Allergies	Antiinflammatory Agents	Phospholipase A2	Hydrolases acting on ester bonds
22	DAP001190	Clocortolone	0.907538	Very Similar	Inflammatory skin conditions	Corticosteroids	Phospholipase A2	Hydrolases acting on ester bonds
23	DAP001249	Docosanol	0.928929	Very Similar	Herpes simplex virus infection	Antiviral Agents	Toll-like receptor 7	Transmembrane protein
24	DAP001380	Fluticasone	0.881467	Similar	Inflammatory diseases	Anti-Inflammatory Agents	Glucocorticoid receptor	Zinc-finger
25	DAP000874	Mannitol	0.945584	Very Similar	Renal failure	Sweetening Agents	Oxidoreductases acting on the CH-OH group of donors	NULL

## Sheet: Herba Ephedrae
ID	Drug ID	Drug Name	Tanimoto Coefficient	Similarity Level	Indication	Therapeutic Class	Target	Target-BioChemical Class
1	DAP000027	Mecamylamine	0.875859	Similar	Hypertension	Antihypertensive Agents	Nicotinic acetylcholine receptor	Ion transport
2	DAP000097	Naloxone	0.983569	Very Similar	Narcotic depression	Antinarcotic Agents	Mu-type opioid receptor	G-protein coupled receptor (rhodopsin family)
3	DAP000111	Erythromycin	0.854587	Similar	Bacterial Infection	Anti-Bacterial Agents	50S ribosomal subunit	NULL
4	DAP000174	Acarbose	0.965172	Very Similar	Cardiovascular Disorders	Hypoglycemic Agents	Alpha-glucosidase	Transmembrane protein
5	DAP000276	Bexarotene	0.972143	Very Similar	Cutaneous T-cell lymphoma	Antineoplastic Agents	Retinoid X receptor	NULL
6	DAP000290	Calcidiol	0.934591	Very Similar	Vitamin D deficiency	Vitamins	Vitamin D receptor	Zinc-finger
7	DAP000401	Oxytetracycline	0.87219	Similar	Bacterial infections	Antibacterial Agents	30S ribosomal subunit	NULL
8	DAP000421	Fluocinonide	0.875524	Similar	Fluocinonide	Anti-inflammatory Agents	Corticosteroid-binding globulin	NULL
9	DAP000465	Ouabain	0.916696	Very Similar	Atrial fibrillation and heart failure	Cardiotonic Agents	Sodium/potassium-transporting ATPase alpha-1 chain	Hydrolases acting on acid anhydrides
10	DAP000485	Oxprenolol	0.974841	Very Similar	Hypertension	Antihypertensive Agents	Beta-1 adrenergic receptor	G-protein coupled receptor (rhodopsin family)
11	DAP000557	Vigabatrin	0.931976	Very Similar	Epilepsy; Infantile spasms in children aged 1 month to 2 years and complex partial seizures in adults	Anticonvulsants	4-aminobutyrate aminotransferase, mitochondrial	Transferases transferring nitrogenous groups
12	DAP000574	Phendimetrazine	0.955651	Very Similar	Obesity	Anorexigenic Agents	Alpha-1B adrenergic receptor	G-protein coupled receptor (rhodopsin family)
13	DAP000668	Butalbital	0.958278	Very Similar	Headache	Analgesics	Gamma-aminobutyric acid receptor subunit alpha-1	Chloride channel
14	DAP000670	Talbutal	0.970952	Very Similar	Sedation	Hypnotics and Sedatives	Gamma-aminobutyric acid receptor subunit alpha-1	Chloride channel
15	DAP000674	Secobarbital	0.963822	Very Similar	Insomnia	Hypnotics and Sedatives	Gamma-aminobutyric acid receptor subunit alpha-1	Chloride channel
16	DAP000677	Methohexital	0.964579	Very Similar	Anesthetic	Anesthetics	Gamma-aminobutyric acid receptor subunit alpha-1	Chloride channel
17	DAP000684	Thiamylal	0.974469	Very Similar	Anesthesia	Hypnotics and Sedatives	Gamma-aminobutyric acid receptor subunit alpha-1	Chloride channel
18	DAP000697	Entecavir	0.981653	Very Similar	Hepatitis B infection	Antiviral Agents	HBV polymerase	DNA-directed DNA polymerase
19	DAP000698	Telbivudine	0.981996	Very Similar	Hepatitis B infection	Antiviral Agents	HBV polymerase	DNA-directed DNA polymerase
20	DAP000748	Ethacrynic acid	0.975964	Very Similar	High blood pressure	Diuretics	Solute carrier family 12 member 1	Ion transport
21	DAP000814	Flumethasone Pivalate	0.884644	Similar	Contact dermatitis	Anti-inflammatory Agents	Corticosteroid-binding globulin	NULL
22	DAP000860	Phenmetrazine	0.862486	Similar	Obesity	Appetite Depressants	Dopamine reuptake	NULL
23	DAP000880	Tigecycline	0.859602	Similar	Bacterial infections	Antibacterial Agents	30S ribosomal subunit	NULL
24	DAP000882	Clomocycline	0.870774	Similar	Bacterial infections	Antibacterial Agents	30S ribosomal subunit	NULL
25	DAP000884	Rolitetracycline	0.868263	Similar	Bacterial infections	Antibacterial Agents	30S ribosomal subunit	NULL
26	DAP000885	Roxithromycin	0.857612	Similar	Bacterial infections	Antibacterial Agents	50S large ribosomal subunit	NULL
27	DAP000941	Alprenolol	0.983973	Very Similar	Hypertension	Antiarrhythmic Agents	Beta-1 adrenergic receptor	G-protein coupled receptor (rhodopsin family)
28	DAP000984	Streptozocin	0.854852	Similar	Metastatic islet cell carcinoma	Metastatic islet cell carcinoma	DNA	NULL
29	DAP000996	Methoxsalen	0.879762	Similar	Psoriasis	Antineoplastic Agents	DNA	NULL
30	DAP001034	Aprobarbital	0.953772	Very Similar	Insomnia	Anticonvulsants	Gamma-aminobutyric-acid type A (GABA(A)) receptor	Chloride channel
31	DAP001116	Glycopyrrolate	0.914887	Very Similar	Anesthetic	Anticholinergic Agents	Muscarinic acetylcholine receptor M1	G-protein coupled receptor (rhodopsin family)
32	DAP001184	Diflorasone	0.973672	Very Similar	Skin Allergies	Antiinflammatory Agents	Phospholipase A2	Hydrolases acting on ester bonds
33	DAP001190	Clocortolone	0.913634	Very Similar	Inflammatory skin conditions	Corticosteroids	Phospholipase A2	Hydrolases acting on ester bonds
34	DAP001249	Docosanol	0.910718	Very Similar	Herpes simplex virus infection	Antiviral Agents	Toll-like receptor 7	Transmembrane protein
35	DAP001306	Hesperetin	0.901428	Very Similar	High Cholesterol level	Anticholesteremic Agents	Diglyceride acyltransferase	Acyltransferases
36	DAP001380	Fluticasone	0.911344	Very Similar	Inflammatory diseases	Anti-Inflammatory Agents	Glucocorticoid receptor	Zinc-finger
37	DAP001407	Nalmefene	0.972002	Very Similar	Alcohol dependence	Anti-craving Agents	Opioid receptor	G-protein coupled receptor (rhodopsin family)
38	DAP001419	Quercetin	0.877674	Similar	Obesity	Hypoglycemic Agents	Lyso-PAF: acetyl-CoA acetyltransferase	NULL
39	DAP001461	B-Lactams	0.928481	Very Similar	Bacterial infections	NULL	D-alanyl-D-alanine carboxypeptidase	Hydrolases acting on peptide bonds (Peptidases)
40	DAP001521	SM-101	0.971936	Very Similar	Idiopathic thrombocytopenic purpura	NULL	CD32	Transmembrane protein
41	DAP001527	Tetracyclines	0.87001	Similar	Bacterial infections	NULL	16S rRNA A site	NULL
42	DCL000061	AZD3409	0.967618	Very Similar	Solid Tumors	Antineoplastic Agents	Farnesyl protein transferase	Transferases transferring alkyl or aryl groups
43	DCL000089	CNF1010	0.917405	Very Similar	Solid Tumors, Chronic Myelogenous Leukemia	Antineoplastic Agents	Heat shock protein HSP 90	NULL
44	DCL000144	KOS-2187	0.918506	Very Similar	Gastrointestinal Disorders, Gastroesophageal Reflux Disease	NULL	Motilin receptor	G-protein coupled receptor (rhodopsin family)
45	DCL000526	Esreboxetine	0.870022	Similar	Fibromyalgia	NULL	Norepinephrine transporter	Transmembrane protein
46	DCL000569	MK-1775	0.942467	Very Similar	Cervical Cancer	NULL	Wee1A kinase	NULL

## Sheet: Radix Astragali
ID	Drug ID	Drug Name	Tanimoto Coefficient	Similarity Level	Indication	Therapeutic Class	Target	Target-BioChemical Class
1	DAP000105	Atracurium	0.850722	Similar	General anesthesia	Neuromuscular Nondepolarizing Agents	Neuronal acetylcholine receptor	Ion transport
2	DAP000111	Erythromycin	0.915128	Very Similar	Bacterial Infection	Anti-Bacterial Agents	50S ribosomal subunit	NULL
3	DAP000166	Lithium	0.999872	Very Similar	Bipolar Disorder	Hypnotics and Sedatives	Glycogen synthase kinase-3	Transferases transferring phosphorus-containing groups
4	DAP000174	Acarbose	0.898709	Similar	Cardiovascular Disorders/Diabetes mellitus	Hypoglycemic Agents	Alpha-glucosidase	Transmembrane protein
5	DAP000196	Cisatracurium Besylate	0.850722	Similar	General anesthesia	Neuromuscular Blocking Agents	Neuronal acetylcholine receptor	Ion transport
6	DAP000263	Bethanechol	0.956504	Very Similar	Urinary retention	Parasympathomimetics	Muscarinic acetylcholine receptor	G-protein coupled receptor (rhodopsin family)
7	DAP000291	Ergocalciferol	0.886585	Similar	Hypoparathyroidism	Vitamins	Vitamin D receptor	Zinc-finger
8	DAP000342	Trospium	0.930478	Very Similar	Spasm	Parasympatholytics	Muscarinic acetylcholine receptor	G-protein coupled receptor (rhodopsin family)
9	DAP000344	Tiotropium	0.997519	Very Similar	Chronic obstructive pulmonary disease	Bronchodilator Agents	Muscarinic acetylcholine receptor M3	G-protein coupled receptor (rhodopsin family)
10	DAP000347	Carbachol	0.962598	Very Similar	Glaucoma	Cardiotonic Agents	Neuronal acetylcholine receptor subunit alpha-2	Ion transport
11	DAP000350	Doxacurium chloride	0.852647	Similar	General anesthesia	Neuromuscular Nondepolarizing Agents	Neuronal acetylcholine receptor subunit alpha-2	Ion transport
12	DAP000355	Doxacurium	0.931597	Very Similar	Spasms, Pain	Analgesics	Nicotinic acetylcholine receptor alpha subunit	Ion transport
13	DAP000408	Azithromycin	0.904188	Very Similar	Bacterial infections	Antibacterial Agents	50S ribosomal subunit	NULL
14	DAP000410	Clarithromycin	0.898635	Similar	Bacterial infections	Antibacterial Agents	50S ribosomal subunit	NULL
15	DAP000467	Aluminium	0.99952	Very Similar	Hyperhidrosis	Anti-Inflammatory Agents	Sodium/potassium-transporting ATPase alpha-1 chain	Hydrolases acting on acid anhydrides
16	DAP000470	Paclitaxel	0.931202	Very Similar	Cancers	Antineoplastic Agents	Tubulin beta	NULL
17	DAP000562	Edrophonium	0.96266	Very Similar	Diagnosis of myasthenia gravis	Antidotes	Acetylcholinesterase	Hydrolases acting on ester bonds
18	DAP000563	Neostigmine	0.867033	Similar	Myasthenia gravis	Parasympathomimetics	Acetylcholinesterase	Hydrolases acting on ester bonds
19	DAP000590	Docetaxel	0.950119	Very Similar	Cancers	Antineoplastic Agents	Tubulin	NULL
20	DAP000823	Homatropine Methylbromide	0.990512	Very Similar	Peptic ulcer disease	Anti-Ulcer Agents	Muscarinic acetylcholine receptor M5	G-protein coupled receptor (rhodopsin family)
21	DAP000828	Potassium Chloride	0.988722	Very Similar	Hypokalemia	Dietary supplement	Solute carrier family 12 member 1	Ion transport
22	DAP000836	Tridihexethyl	0.98154	Very Similar	Acquired nystagmus	Anticholinergic Agents	Muscarinic acetylcholine receptor	G-protein coupled receptor (rhodopsin family)
23	DAP000863	Protriptyline	0.898146	Similar	Depression	Antidepressants	Norepinephrine reuptake	NULL
24	DAP000885	Roxithromycin	0.927193	Very Similar	Bacterial infections	Antibacterial Agents	50S large ribosomal subunit	NULL
25	DAP000894	Demecarium bromide	0.889625	Similar	Open-angle glaucoma	Parasympathomimetics	Acetylcholinesterase	Hydrolases acting on ester bonds
26	DAP000939	Bretylium	0.996559	Very Similar	AV (atrioventricular) heart block	Antiarrhythmic Agents	Beta adrenergic receptor	Transmembrane protein
27	DAP000958	L-Carnitine	0.966751	Very Similar	Nutritional supplement	Vitamins	Carnitine palmitoyltransferase I	Acyltransferases
28	DAP000962	Echothiophate Iodide	0.992205	Very Similar	Chronic glaucoma	Parasympathomimetics	Cholinesterase	Hydrolases acting on ester bonds
29	DAP000969	Icosapent	0.949015	Very Similar	Hyperglyceridemic	Dietary supplement	COX	Oxidoreductases acting on paired donors
30	DAP001109	Methantheline	0.997329	Very Similar	Irritable bowel syndrome	Anticholinergic Agents	Muscarinic acetylcholine receptor	G-protein coupled receptor (rhodopsin family)
31	DAP001115	Mepenzolate	0.983275	Very Similar	Peptic ulcer disease	Parasympatholytics	Muscarinic acetylcholine receptor	G-protein coupled receptor (rhodopsin family)
32	DAP001117	Clidinium	0.998583	Very Similar	Abdominal/stomach pain	Analgesics	Muscarinic acetylcholine receptor M1	G-protein coupled receptor (rhodopsin family)
33	DAP001123	Propantheline	0.993764	Very Similar	Excessive sweating (hyperhidrosis)	Antispasmodics	acetylcholine receptor M1	G-protein coupled receptor (rhodopsin family)
34	DAP001124	Oxyphenonium	0.991682	Very Similar	Spasm	Parasympatholytics	Muscarinic acetylcholine receptor M1	G-protein coupled receptor (rhodopsin family)
35	DAP001126	Methylscopolamine	0.998954	Very Similar	Peptic ulcer disease	Anticholinergic Agents	Muscarinic acetylcholine receptor M2	G-protein coupled receptor (rhodopsin family)
36	DAP001130	Diphemanil Methylsulfate	0.974383	Very Similar	Peptic ulcer disease	Parasympatholytics	Muscarinic acetylcholine receptor M3	G-protein coupled receptor (rhodopsin family)
37	DAP001267	Butoconazole	0.85655	Similar	Fungal infections	Antifungal Agents	Yeast Lanosterol 14-alpha demethylase	Oxidoreductases acting on paired donors
38	DAP001269	Econazole	0.851516	Similar	Fungal infections	Antifungal Agents	Yeast Lanosterol 14-alpha demethylase	Oxidoreductases acting on paired donors
39	DAP001273	Cholecalciferol	0.876444	Similar	Vitamin D deficiency	Vitamins	Vitamin D receptor	Zinc-finger
40	DAP001313	Iron	0.999816	Very Similar	Iron-deficiency anemia	Iron Supplement	Hemoglobin	NULL
41	DAP001492	Macrolides	0.878316	Similar	Bacterial infections	NULL	23S rRNA	NULL
42	DCL000144	KOS-2187	0.952007	Very Similar	Gastrointestinal Disorders, Gastroesophageal Reflux Disease	NULL	Motilin receptor	G-protein coupled receptor (rhodopsin family)

## Sheet: Raidix Paeoniae Alba
ID	Drug ID	Drug Name	Tanimoto Coefficient	Similarity Level	Indication	Therapeutic Class	Target	Target-BioChemical Class
1	DAP000166	Lithium	0.999872	Very Similar	Bipolar Disorder	Hypnotics and Sedatives	Glycogen synthase kinase-3	Transferases transferring phosphorus-containing groups
2	DAP000291	Ergocalciferol	0.886585	Similar	Hypoparathyroidism	Vitamins	Vitamin D receptor	Zinc-finger
3	DAP000418	Flurandrenolide	0.895163	Similar	Inflammatory diseases	Anti-inflammatory Agents	Corticosteroid-binding globulin	NULL
4	DAP000465	Ouabain	0.861357	Similar	Atrial fibrillation and heart failure	Cardiotonic Agents	Sodium/potassium-transporting ATPase alpha-1 chain	Hydrolases acting on acid anhydrides
5	DAP000467	Aluminium	0.99952	Very Similar	Hyperhidrosis	Anti-Inflammatory Agents	Sodium/potassium-transporting ATPase alpha-1 chain	Hydrolases acting on acid anhydrides
6	DAP000776	Acetaminophen	0.918042	Very Similar	Pain	Analgesics	Cyclooxygenase	Oxidoreductases acting on paired donors
7	DAP000828	Potassium Chloride	0.988722	Very Similar	Hypokalemia	Dietary supplement	Solute carrier family 12 member 1	Ion transport
8	DAP000843	Aspirin	0.854213	Similar	Pain	Analgesics	Cyclooxygenase	Oxidoreductases acting on paired donors
9	DAP000850	Hydroxystilbamidine Isethionate	0.857509	Similar	Blastomycosis	Antifungal Agents	DNA	NULL
10	DAP001025	Pentosan Polysulfate	0.903367	Very Similar	Interstitial cystitis/painful bladder syndrome	Anticoagulants	Fibroblast growth factor receptor 2	Transferases transferring phosphorus-containing groups
11	DAP001044	Amcinonide	0.859112	Similar	Inflammatory diseases	Antiinflammatory Agents	Glucocorticoid receptor	Zinc-finger
12	DAP001046	Flunisolide	0.866376	Similar	Allergic rhinitis	Antiasthmatic Agents	Glucocorticoid receptor	Zinc-finger
13	DAP001227	Sodium lauryl sulfate	0.908351	Very Similar	Constipation	Surface-Active Agents	Serum albumin	NULL
14	DAP001273	Cholecalciferol	0.876444	Similar	Vitamin D deficiency	Vitamins	Vitamin D receptor	Zinc-finger
15	DAP001276	Sodium Tetradecyl Sulfate	0.901019	Very Similar	Varicose and spider veins of the leg	Sclerosing Agents	Vitamin K-dependent protein C	Hydrolases acting on peptide bonds (Peptidases)
16	DAP001304	Inulin	0.869157	Similar	Measure kidney function	Hypoglycemic Agents	Cycloinulo-oligosaccharide fructanotransferase	NULL
17	DAP001313	Iron	0.999816	Very Similar	Iron-deficiency anemia	Iron Supplement	Hemoglobin	NULL
18	DAP001432	Tetrodotoxin	0.90944	Very Similar	Bacterial infections	Antibacterial Agents	Sodium channel protein type 5 subunit alpha	Voltage-gated channel
19	DAP001435	Triclosan	0.86451	Similar	Bacterial infections	Antibacterial Agents	Enoyl-ACP reductase	Oxidoreductases acting on the CH-CH group of donors
20	DAP001506	Pravigard	0.854213	Similar	Myocardial infarction, cerebrovascular ischaemia	NULL	Cyclooxygenase	Oxidoreductases acting on paired donors
21	DAP001506	Pravigard	0.854213	Similar	Myocardial infarction, cerebrovascular ischaemia	NULL	HMG-CoA reductase	Oxidoreductases acting on the CH-OH group of donors

## Sheet: Radix Glycytthizae
ID	Drug ID	Drug Name	Tanimoto Coefficient	Similarity Level	Indication	Therapeutic Class	Target	Target-BioChemical Class
1	DAP000009	Isotretinoin	0.887072	Similar	Acne vulgaris	Anti-acne Agents	Retinoic acid receptor	Zinc-finger
2	DAP000044	Dutasteride	0.926388	Very Similar	Benign prostatic hyperplasia/Prostate cancer	Antihyperplasia Agents/Antineoplastic Agents	5-alpha reductase/5-alpha reductase	Oxidoreductases acting on the CH-CH group of donors /Oxidoreductases acting on the CH-CH group of donors
3	DAP000066	Epinephrine	0.868195	Similar	Anaphylaxis and sepsis	Vasoconstrictor Agents	Beta adrenergic receptor	Transmembrane protein
4	DAP000080	Isoproterenol	0.859229	Similar	Bradycardia or heart block	Cardiotonic Agents	Beta adrenergic receptor	Transmembrane protein
5	DAP000097	Naloxone	0.983477	Very Similar	Narcotic depression	Antinarcotic Agents	Mu-type opioid receptor	G-protein coupled receptor (rhodopsin family)
6	DAP000114	Vincristine	0.858867	Similar	Acute lymphoblastic leukemia and nephroblastoma	Antineoplastic Agents	Tubulin	NULL
7	DAP000162	Tacrolimus	0.863015	Similar	Ocular allergy/Organ Transplant	Immunosuppressive Agents	Calcineurin	NULL
8	DAP000208	Lubiprostone	0.872023	Similar	Chronic idiopathic constipation	Anti-constipation Agents	Chloride channel protein 2	Voltage-gated channel
9	DAP000275	Alitretinoin	0.887072	Similar	Kaposi's sarcoma	Antineoplastic Agents	Retinoic acid receptor alpha	Zinc-finger
10	DAP000276	Bexarotene	0.923614	Very Similar	Cutaneous T-cell lymphoma	Antineoplastic Agents	Retinoid X receptor	null
11	DAP000290	Calcidiol	0.89675	Similar	Vitamin D deficiency	Vitamins	Vitamin D receptor	Zinc-finger
12	DAP000291	Ergocalciferol	0.886585	Similar	Hypoparathyroidism	Vitamins	Vitamin D receptor	Zinc-finger
13	DAP000320	Budesonide	0.882274	Similar	Asthma, non-infectious rhinitis	Anti-inflammatory Agents	Glucocorticoid receptor	Zinc-finger
14	DAP000410	Clarithromycin	0.943178	Very Similar	Bacterial infections	Antibacterial Agents	50S ribosomal subunit	null
15	DAP000416	Beclomethasone	0.873578	Similar	Asthma and allergic rhinitis	Anti-Asthmatic Agents	Corticosteroid-binding globulin	null
16	DAP000417	Triamcinolone	0.928812	Very Similar	Allergies	Anti-inflammatory Agents	Corticosteroid-binding globulin	null
17	DAP000418	Flurandrenolide	0.854037	Similar	Inflammatory diseases	Anti-inflammatory Agents	Corticosteroid-binding globulin	null
18	DAP000419	Prednisolone	0.991596	Very Similar	Asthma and rheumatoid arthritis	Anti-inflammatory Agents	Corticosteroid-binding globulin	null
19	DAP000421	Fluocinonide	0.892885	Similar	Inflammation and itching	Antiinflammatory Agents	Phospholipase A2	Hydrolases acting on ester bonds
20	DAP000464	Deslanoside	0.871767	Similar	Congestive cardiac insufficiency, arrhythmias and heart failure	Anti-Arrhythmia Agents	Sodium/potassium-transporting ATPase alpha-1 chain	Hydrolases acting on acid anhydrides
21	DAP000470	Paclitaxel	0.977492	Very Similar	Cancers	Antineoplastic Agents	Tubulin beta	null
22	DAP000472	Hydromorphone	0.949282	Very Similar	Pain	Analgesics	Delta-type opioid receptor	G-protein coupled receptor (rhodopsin family)
23	DAP000485	Oxprenolol	0.980654	Very Similar	Hypertension	Antihypertensive Agents	Beta-1 adrenergic receptor	G-protein coupled receptor (rhodopsin family)
24	DAP000557	Vigabatrin	0.950066	Very Similar	Epilepsy; Infantile spasms in children aged 1 month to 2 years and complex partial seizures in adults	Anticonvulsants	4-aminobutyrate aminotransferase, mitochondrial	Transferases transferring nitrogenous groups
25	DAP000559	Galantamine	1	Very Similar	Alzheimer's disease	Parasympathomimetics	Acetylcholinesterase	Hydrolases acting on ester bonds
26	DAP000590	Docetaxel	0.976086	Very Similar	Cancers	Antineoplastic Agents	Tubulin	null
27	DAP000607	Tolcapone	0.963939	Very Similar	Parkinson's disease	Antiparkinson Agents	Catechol-O-methyl-transferase	Transferases transferring one-carbon groups
28	DAP000663	Sirolimus	0.883963	Similar	Dutch Elm disease/Organ rejection	Immunosuppressive Agents	Serine/threonine-protein kinase mTOR	NULL
29	DAP000668	Butalbital	0.967228	Very Similar	Headache	Analgesics	Gamma-aminobutyric acid receptor subunit alpha-1	Chloride channel
30	DAP000670	Talbutal	0.972734	Very Similar	Sedation	Hypnotics and Sedatives	Gamma-aminobutyric acid receptor subunit alpha-1	Chloride channel
31	DAP000674	Secobarbital	0.969882	Very Similar	Insomnia	Hypnotics and Sedatives	Gamma-aminobutyric acid receptor subunit alpha-1	Chloride channel
32	DAP000677	Methohexital	0.970318	Very Similar	Anesthetic	Anesthetics	Gamma-aminobutyric acid receptor subunit alpha-1	Chloride channel
33	DAP000684	Thiamylal	0.974736	Very Similar	Anesthesia	Hypnotics and Sedatives	Gamma-aminobutyric acid receptor subunit alpha-1	Chloride channel
34	DAP000697	Entecavir	0.959661	Very Similar	Hepatitis B infection	Antiviral Agents	HBV polymerase	DNA-directed DNA polymerase
35	DAP000698	Telbivudine	0.960137	Very Similar	Hepatitis B infection	Antiviral Agents	HBV polymerase	DNA-directed DNA polymerase
36	DAP000712	Miglitol	0.891061	Similar	Diabetes mellitus	Hypoglycemic Agents	Maltase-glucoamylase, intestinal	Transmembrane protein
37	DAP000718	Hydrocortisone	0.991596	Very Similar	Inflammatory diseases	Anti-inflammatory Agents	Nitric oxide synthase, inducible	Oxidoreductases acting on paired donors
38	DAP000743	Acitretin	0.856409	Similar	Psoriasis	Keratolytic Agents	Signal transducer and activator of transcription 3	NULL
39	DAP000748	Ethacrynic acid	0.97707	Very Similar	High blood pressure	Diuretics	Solute carrier family 12 member 1	Ion transport
40	DAP000785	Vinblastine	0.854704	Similar	Cancers	Antineoplastic Agents	Tubulin beta-2 chain	NULL
41	DAP000811	Orciprenaline	0.855195	Similar	Asthma	Bronchodilator Agents	Beta-2 adrenergic receptor	Transmembrane protein
42	DAP000813	Fluocinolone Acetonide	0.932528	Very Similar	Inflammatory diseases	Anti-inflammatory Agents	Corticosteroid-binding globulin	null
43	DAP000814	Flumethasone Pivalate	0.876799	Similar	Contact dermatitis	Anti-inflammatory Agents	Corticosteroid-binding globulin	null
44	DAP000872	N-Acetyl-D-glucosamine	0.915743	Very Similar	Autoimmune diseases	Anti-Inflammatory Agents	Alpha-N-acetylglucosaminidase	Glycosylases
45	DAP000874	Mannitol	0.959696	Very Similar	Renal failure	Sweetening Agents	Mannitol 2-dehydrogenase	Oxidoreductases acting on the CH-OH group of donors
46	DAP000888	Dirithromycin	0.866197	Similar	Bacterial infections	Antibacterial Agents	50S ribosomal subunit	null
47	DAP000891	Cyclobenzaprine	0.903803	Very Similar	Depression	Antidepressants	5-hydroxytryptamine 2 receptor	G-protein coupled receptor (rhodopsin family)
48	DAP000904	Fluoxymesterone	0.868501	Similar	Male hypogonadism	Anabolic Agents	Androgen receptor	Zinc-finger
49	DAP000941	Alprenolol	0.980762	Very Similar	Hypertension	Antiarrhythmic Agents	Beta-1 adrenergic receptor	G-protein coupled receptor (rhodopsin family)
50	DAP000949	Vindesine	0.879002	Similar	Cancers	Antineoplastic Agents	Beta Tubulin	null
51	DAP000984	Streptozocin	0.898526	Similar	Metastatic islet cell carcinoma	Antineoplastic Agents	DNA	NULL
52	DAP001015	Dienestrol	0.853317	Similar	Atrophic vaginitis	Estrogens	Estrogen receptor	Zinc-finger
53	DAP001025	Pentosan Polysulfate	0.892041	Similar	Interstitial cystitis/painful bladder syndrome	Anticoagulants	Fibroblast growth factor receptor 2	Transferases transferring phosphorus-containing groups
54	DAP001034	Aprobarbital	0.96473	Very Similar	Insomnia	Anticonvulsants	Gamma-aminobutyric-acid type A (GABA(A)) receptor	Chloride channel
55	DAP001040	Methylprednisolone	0.986013	Very Similar	Rheumatoid arthritis	Antiinflammatory Agents	Glucocorticoid receptor	Zinc-finger
56	DAP001041	Prednisone	0.991596	Very Similar	Inflammatory diseases	Antiinflammatory Agents	Glucocorticoid receptor	Zinc-finger
57	DAP001042	Mometasone	0.852384	Similar	Skin Allergies	Antiinflammatory Agents	Glucocorticoid receptor	Zinc-finger
58	DAP001043	Betamethasone	0.934236	Very Similar	Inflammatory diseases	Antiinflammatory Agents	Glucocorticoid receptor	Zinc-finger
59	DAP001044	Amcinonide	0.930927	Very Similar	Inflammatory diseases	Antiinflammatory Agents	Glucocorticoid receptor	Zinc-finger
60	DAP001045	Loteprednol Etabonate	0.89801	Similar	Eye inflammation	Antiallergic Agents	Glucocorticoid receptor	Zinc-finger
61	DAP001047	Fluorometholone	0.931437	Very Similar	Inflammatory diseases	Anti-Allergic Agents	Glucocorticoid receptor	Zinc-finger
62	DAP001048	Medrysone	0.9313	Very Similar	Eye inflammation	Topical anti-inflammatory Agent	Glucocorticoid receptor	Zinc-finger
63	DAP001105	Fludrocortisone	0.919084	Very Similar	Cerebral salt-wasting syndrome	Antiinflammatory Agents	Mineralocorticoid receptor	Zinc-finger
64	DAP001116	Glycopyrrolate	0.927038	Very Similar	Anesthetic	Anticholinergic Agents	Muscarinic acetylcholine receptor M1	G-protein coupled receptor (rhodopsin family)
65	DAP001166	Nafcillin	0.850761	Similar	Bacterial infections	Antibacterial Agents	Penicillin-binding protein	Null
66	DAP001183	Clobetasol	0.91443	Very Similar	Inflammation and itching	Antiinflammatory Agents	Phospholipase A2	Hydrolases acting on ester bonds
67	DAP001184	Diflorasone	0.87887	Similar	Skin Allergies	Antiinflammatory Agents	Phospholipase A2	Hydrolases acting on ester bonds
68	DAP001190	Clocortolone	0.86832	Similar	Inflammatory skin conditions	Corticosteroids	Phospholipase A2	Hydrolases acting on ester bonds
69	DAP001193	Sulfanilamide	0.859094	Similar	Bacterial infections	Anti-Bacterial Agents	Phosphomannose isomerase	Intramolecular oxidoreductases
70	DAP001221	Tretinoin	0.887072	Similar	Acne vulgaris	Keratolytic Agents	Retinoic acid receptor	Zinc-finger
71	DAP001222	Temsirolimus	0.873126	Similar	Renal cell carcinoma/Renal cell carcinoma	Antineoplastic Agents	Serine/threonine-protein kinase mTOR	null
72	DAP001273	Cholecalciferol	0.876444	Similar	Vitamin D deficiency	Vitamins	Vitamin D receptor	Zinc-finger
73	DAP001304	Inulin	0.865375	Similar	Measure kidney function	Hypoglycemic Agents	Cycloinulo-oligosaccharide fructanotransferase	NULL
74	DAP001306	Hesperetin	0.922364	Very Similar	High Cholesterol level	Anticholesteremic Agents	Diglyceride acyltransferase	Acyltransferases
75	DAP001322	Amphotericin B	0.873908	Similar	Fungal infections	Antifungal Agents	Fungal outer membrane	NULL
76	DAP001342	Aclarubicin	0.85249	Similar	Cancer	Antineoplastic Agents	DNA topoisomerase II	Isomerases
77	DAP001380	Fluticasone	0.883544	Similar	Inflammatory diseases	Anti-Inflammatory Agents	Glucocorticoid receptor	Zinc-finger
78	DAP001407	Nalmefene	0.931416	Very Similar	Alcohol dependence	Anti-craving Agents	Opioid receptor	G-protein coupled receptor (rhodopsin family)
79	DAP001419	Quercetin	0.8628	Similar	Obesity	Hypoglycemic Agents	Lyso-PAF: acetyl-CoA acetyltransferase	NULL
80	DAP001461	B-Lactams	0.937811	Very Similar	Bacterial infections	NULL	D-alanyl-D-alanine carboxypeptidase	Hydrolases acting on peptide bonds (Peptidases)
81	DAP001521	SM-101	0.974241	Very Similar	Idiopathic thrombocytopenic purpura	NULL	CD32	Transmembrane protein
82	DCL000061	AZD3409	0.928128	Very Similar	Solid Tumors	Antineoplastic Agents	Farnesyl protein transferase	Transferases transferring alkyl or aryl groups
83	DCL000089	CNF1010	0.935651	Very Similar	Solid Tumors, Chronic Myelogenous Leukemia	Antineoplastic Agents	Heat shock protein HSP 90	null
84	DCL000144	KOS-2187	0.879465	Similar	Gastrointestinal Disorders, Gastroesophageal Reflux Disease	NULL	Motilin receptor	G-protein coupled receptor (rhodopsin family)
85	DCL000217	RTA 402	0.927454	Very Similar	Multiple Myeloma, Solid Tumors, Lymphoma	Antineoplastic Agents	Transcription factor STAT3	null
86	DCL000569	MK-1775	0.934094	Very Similar	Cervical Cancer	NULL	Wee1A kinase	null
