# Supplementary material for: A Systems Biology-Based Investigation into the Pharmacological Mechanisms of Wu Tou Tang Acting on Rheumatoid Arthritis by Integrating Network Analysis
Source: Evid Based Complement Alternat Med. 2013 Mar 28;2013:548498. doi: 10.1155/2013/548498 (PMC3625555; doi:10.1155/2013/548498)
Supplement: Supplementary file 4 [file 548498.f4.xlsx]

## Sheet: Sheet1
Table S4 Detailed information on fifty-nine FDA approved drugs and their known targets
FDA_approved_DrugID	KnownTargetID
DAP000008	TTDS00099
DAP000008	TTDS00100
DAP000037	TTDS00150
DAP000039	TTDS00156
DAP000046	TTDS00080
DAP000047	TTDS00035
DAP000104	TTDS00038
DAP000104	TTDS00172
DAP000124	TTDS00527
DAP000138	TTDS00418
DAP000246	TTDS00037
DAP000295	TTDS00106
DAP000323	TTDS00086
DAP000387	TTDS00132
DAP000391	TTDS00249
DAP000412	TTDS00026
DAP000420	TTDS00068
DAP000477	TTDS00026
DAP000479	TTDS00035
DAP000508	TTDS00402
DAP000514	TTDS00402
DAP000519	TTDS00402
DAP000543	TTDS00024
DAP000566	TTDS00092
DAP000575	TTDS00158
DAP000599	TTDS00304
DAP000612	TTDS00390
DAP000614	TTDS00296
DAP000619	TTDS00039
DAP000657	TTDS00355
DAP000682	TTDS00403
DAP000693	TTDS00121
DAP000711	TTDS00223
DAP000762	TTDS00380
DAP000775	TTDS00306
DAP000777	TTDS00041
DAP000785	TTDS00389
DAP000787	TTDS00213
DAP000803	TTDS00292
DAP000819	TTDS00274
DAP000827	TTDS00360
DAP000866	TTDS00467
DAP000875	TTDS00503
DAP000875	TTDS00514
DAP000910	TTDS00181
DAP000957	TTDS00433
DAP001032	TTDS00019
DAP001107	TTDS00341
DAP001112	TTDS00001
DAP001160	TTDS00210
DAP001169	TTDS00210
DAP001172	TTDS00210
DAP001231	TTDS00155
DAP001245	TTDS00301
DAP001265	TTDS00161
DAP001368	TTDS00012
DAP001397	TTDS00086
DAP001402	TTDS00213
DAP001417	TTDS00332
DAP001431	TTDS00157
DAP001478	TTDS00097
DAP001515	TTDS00010
