# Supplementary material for: A Systems Biology-Based Investigation into the Pharmacological Mechanisms of Wu Tou Tang Acting on Rheumatoid Arthritis by Integrating Network Analysis
Source: Evid Based Complement Alternat Med. 2013 Mar 28;2013:548498. doi: 10.1155/2013/548498 (PMC3625555; doi:10.1155/2013/548498)
Supplement: Supplementary file 5 [file 548498.f5.xlsx]

## Sheet: Sheet1
Table S5 Detailed information on the major candidate effector molecules and their corresponding compounds in Wu Tou Tang
Drug	Compounds	Target (Uniprot_ID)	Target (Uniprot_ACC)	Gene symbol
Raidix Paeoniae Alba	Paeoniflorin;Paeonilactone A	GCR_HUMAN	P04150	NR3C1
Radix Glycytthizae	Isogosferol; Phebalosin; Neoisopulegol; Neohancoside A; Phebalosin	ADRB1_HUMAN	P08588	ADRB1
Radix Glycytthizae	2-Methy1-1,3,6-tri	ADRB2_HUMAN	P07550	ADRB2
Radix Glycytthizae	Glycyrrhetinic acid; Glycyrrhetol; Isoramanone; Methyl-24-hydroxyglycyrrhetate; Liquoric acid; Methylglycyrrhetate	GCR_HUMAN	P04150	NR3C1
Radix Glycytthizae	licochalcone A; Isogosferol; Neoisopulegol; Neohancoside A; Phebalosin	HS90A_HUMAN	P07900	HSP90AA1
Radix Glycytthizae	Narwedine	OPRD_HUMAN	P41143	OPRD1
Radix Glycytthizae	licochalcone A; Isogosferol; Phebalosin; Neoisopulegol; Neohancoside A	OPRM_HUMAN	P35372	OPRM1
Radix Glycytthizae	Glycyrrhetinic acid; Glycyrrhetol; Methylglycyrrhetate; Methyl-24-hydroxyglycyrrhetate; Methyl linoleate; Liquoric acid	STAT3_HUMAN	P40763	STAT3
Radix Glycytthizae	Glycyrrhetinic acid; Glycyrrhetol; Glycyrrhizic acid; Glyeurysaponin; Licoricesaponine A3; Neowilforine; Methylglycyrrhetate; Methyl-24-hydroxyglycyrrhetate; Liquoric acid; Astragaloside V	TBB5_HUMAN	P07437	TUBB
Herba Ephedrae	(4S,5R)Ephedroxane	ADA1B_HUMAN	P35368	ADRA1B
Herba Ephedrae	delta-Terpineol; trans-belta-Terpineol	ADRB1_HUMAN	P08588	ADRB1
Herba Ephedrae	Methyl-7-epiganoderate	GCR_HUMAN	P04150	NR3C1
Herba Ephedrae	trans-belta-Terpineol; delta-Terpineol	HS90A_HUMAN	P07900	HSP90AA1
Herba Ephedrae	trans-belta-Terpineol; delta-Terpineol	OPRM_HUMAN	P35372	OPRM1
Radix Aconiti	Mescaline	ADA1B_HUMAN	P35368	ADRA1B
Radix Aconiti	Aconitine; Aldohypaconitine	GCR_HUMAN	P04150	NR3C1
