# Supplementary material for: A Systems Biology-Based Investigation into the Pharmacological Mechanisms of Wu Tou Tang Acting on Rheumatoid Arthritis by Integrating Network Analysis
Source: Evid Based Complement Alternat Med. 2013 Mar 28;2013:548498. doi: 10.1155/2013/548498 (PMC3625555; doi:10.1155/2013/548498)
Supplement: Supplementary file 6 [file 548498.f6.xlsx]

## Sheet: Sheet1
Table S6. Positive docking results for compound-potential target interactions
Drug	Compound	Target (Uniprot_ID)	Target (Uniprot_ACC)	Gene symbol	PDB ID	Ehits score
Radix Aconiti	Aconitine	GCR_HUMAN	P04150	NR3C1	3CLD	-8.81
Herba Ephedrae	Methyl-7-epiganoderate	GCR_HUMAN	P04150	NR3C1	3CLD	-8.27
Raidix Paeoniae Alba	Paeoniflorin	GCR_HUMAN	P04150	NR3C1	3CLD	-6.7538
Radix Glycytthizae	2-Methy1-1,3,6-tri	ADRB2_HUMAN	P07550	ADRB2	2RH1	-6.1089
Radix Glycytthizae	Isogosferol	ADRB1_HUMAN	P08588	ADRB1	2YO4	-5.8677
Radix Glycytthizae	Neohancoside A	ADRB1_HUMAN	P08588	ADRB1	2YO4	-5.3842
Radix Glycytthizae	Isoramanone	GCR_HUMAN	P04150	NR3C1	3CLD	-5.3842
Radix Aconiti	Aldohypaconitine	GCR_HUMAN	P04150	NR3C1	3CLD	-5.1362
Radix Glycytthizae	Methylglycyrrhetate	STAT3_HUMAN	P40763	STAT3	2XA4	-4.7329
Herba Ephedrae	delta-Terpineol	ADRB1_HUMAN	P08588	ADRB1	2YO4	-4.6206
Radix Glycytthizae	Neoisopulegol	ADRB1_HUMAN	P08588	ADRB1	2YO4	-4.4959
Radix Glycytthizae	Glycyrrhetol	STAT3_HUMAN	P40763	STAT3	2XA4	-4.4532
Herba Ephedrae	trans-belta-Terpineol	ADRB1_HUMAN	P08588	ADRB1	2YO4	-4.4082
Radix Glycytthizae	Methyl-24-hydroxyglycyrrhetate	STAT3_HUMAN	P40763	STAT3	2XA4	-3.0412
Radix Glycytthizae	Phebalosin	HS90A_HUMAN	P07900	HSP90AA1	2QG2	-1.1475
Radix Glycytthizae	Isogosferol	HS90A_HUMAN	P07900	HSP90AA1	2QG2	-1.0522
Herba Ephedrae	delta-Terpineol	HS90A_HUMAN	P07900	HSP90AA1	2QG2	-0.7313
Radix Glycytthizae	Neoisopulegol	HS90A_HUMAN	P07900	HSP90AA1	2QG2	-0.6922
Herba Ephedrae	trans-belta-Terpineol	HS90A_HUMAN	P07900	HSP90AA1	2QG2	-0.6664
Radix Glycytthizae	Neoisopulegol	OPRM_HUMAN	P35372	OPRM1	4DKL	-0.6176
Herba Ephedrae	delta-Terpineol	OPRM_HUMAN	P35372	OPRM1	4DKL	-0.4721
Herba Ephedrae	trans-belta-Terpineol	OPRM_HUMAN	P35372	OPRM1	4DKL	-0.4526
Radix Glycytthizae	Narwedine	OPRD_HUMAN	P41143	OPRD1	4EJ4	-0.1931
Radix Glycytthizae	Isogosferol	OPRM_HUMAN	P35372	OPRM1	4DKL	-0.1244
Radix Glycytthizae	Phebalosin	OPRM_HUMAN	P35372	OPRM1	4DKL	-0.0769

## Sheet: Sheet2
GCR_HUMAN
ADRB2_HUMAN
ADRB1_HUMAN
STAT3_HUMAN
